# Supplementary material for: Aedes aegypti (Diptera: Culicidae) Immune Responses with Different Feeding Regimes Following Infection by the Entomopathogenic Fungus Metarhizium anisopliae
Source: MDPI journal article supplement (doi:10.3390/insects11020095), 2020-02-01
Supplement: s1 [file s1]

**Table S1.** Kaplan-Meier analysis of all survival curves (all treatments), pair-wise comparisons of *M. anisopliae*-treated blood-fed and sucrose-fed female *A. aegypti* and comparisons of fungus-treated insects to their respective controls.

| Treatments     | All Treatments<br>+ Controls | Blood fed +Fungus $\nu$<br>Sucrose fed + Fungus | Blood fed +Fungus<br>$\nu$ Blood fed controls | Sucrose fed +Fungus<br>$\nu$ Sucrose fed controls |
|----------------|------------------------------|-------------------------------------------------|-----------------------------------------------|---------------------------------------------------|
| $\chi^2$       | 26.22                        | 24.07                                           | 2.19                                          | 14.14                                             |
| <i>p</i> value | < 0.0001                     | < 0.0001                                        | 0.1381                                        | 0.0002                                            |
| df             | 3                            | 1                                               | 1                                             | 1                                                 |

**Table S2.** Summary of results from analysis of the immune related genes with different feeding regimes following fungal infection.

| Tissues              | MIDGUT   |           | FAT BODY |           |
|----------------------|----------|-----------|----------|-----------|
| Condition /<br>Genes | Suc + F  | Blood + F | Suc + F  | Blood + F |
| Cactus               | +        | -         | +        | -         |
| REL 1                | +        | +         | -        | +         |
| REL 2                | -        | +         | -        | +         |
| IMD                  | +        | +         | -        | +         |
| CASPAR               | -        | +         | -        | -         |
| PIAS                 | -        | -         | +        | -         |
| STAT                 | +        | -         | +        | +         |
| Defensin A           | -        | +         | -        | +         |
| Cecropin G           | +        | +         | -        | +         |
| Attacin              | -        | -         | +        | +         |
| <b>Index</b>         | <b>5</b> | <b>6</b>  | <b>4</b> | <b>7</b>  |

**Suc + F:** sucrose fed and exposed to fungus; **Blood + F:** blood fed and exposed to fungus; **Index:** sum of positives.

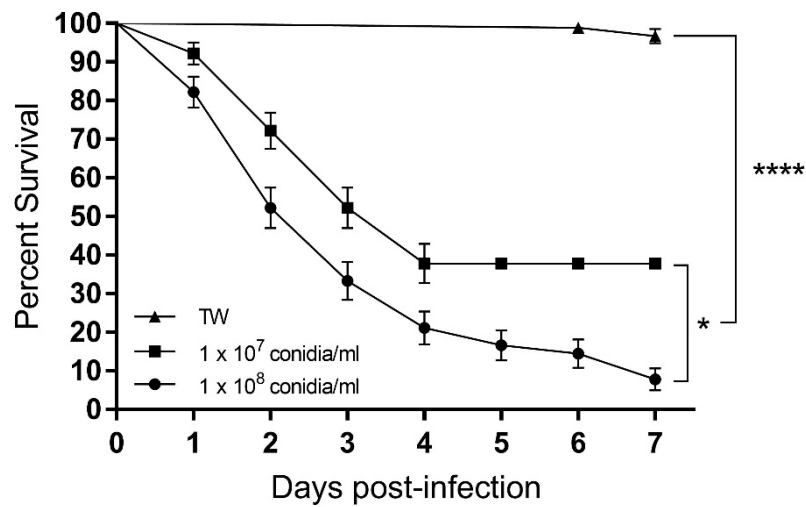

**Figure S1.** Effects of *Metarhizium anisopliae* conidia on the survival rates of adult female *Aedes aegypti* exposed to two concentrations of the fungus. TW – sucrose-fed adult female *A. aegypti* treated with Tween 80 (control);  $1 \times 10^7$  – sucrose-fed adult female *A. aegypti* infected with *M. anisopliae* conidial suspensions ( $1 \times 10^7$  conidia/mL);  $1 \times 10^8$  – sucrose-fed adult female *A. aegypti* and infected with *M. anisopliae* conidial suspensions ( $1 \times 10^8$  conidia/mL).  $n = 45$  insects per treatment. The graph represents three independent experiments and data were analyzed with Kaplan-Meier survival analysis (GraphPad Prism 6 software). Error bars indicate the SEM. Conidia at both concentrations significantly increased mosquitoes mortality compared to each other and to the control treatment (\*:  $p < 0.05$ ; \*\*\*\*  $p < 0.0001$ ).
